# Supplementary material for: Shining light in blind alleys: deciphering bacterial attachment in silicon microstructures
Source: Royal Society of Chemistry journal article supplement (doi:10.1039/d2nh00130f), 2022-01-01
Supplement: d2nh00130f1.pdf [file d2nh00130f1.pdf]

## Supporting Information

### Shining Light in Blind Alleys: Deciphering Bacterial Attachment in Silicon Microstructures

*Heidi Leonard<sup>†\*</sup>, Xin Jiang<sup>†</sup>, Sofia Arshavsky-Graham<sup>†</sup>, Liran Holtzman<sup>†</sup>, Yuri Haimov<sup>†</sup>, Daniel Weizman<sup>†</sup>, Sarel Halachmi<sup>‡</sup>, Ester Segal<sup>†\*</sup>*

<sup>†</sup>Department of Biotechnology and Food Engineering, Technion–Israel Institute of Technology, Haifa 3200003, Israel, <sup>‡</sup>Faculty of Medicine, Technion–Israel Institute of Technology, Haifa, Israel 3200003 and Department of Urology, Bnai Zion Medical Center, Haifa, Israel 3104800

\*corresponding author

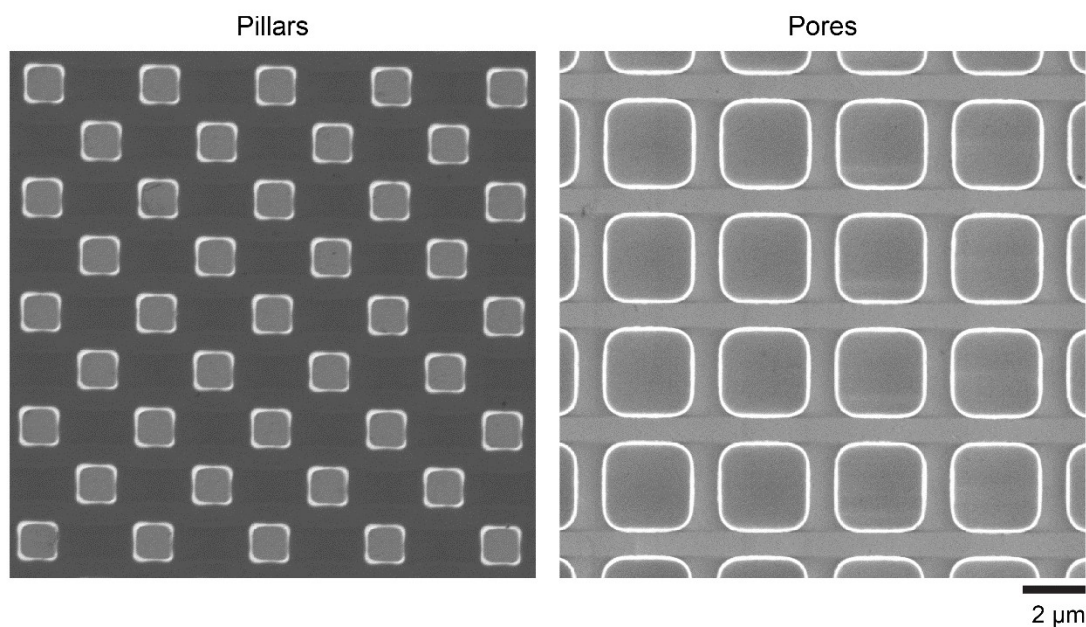

**Figure S1.** Plan-view SEM images of Si pillar microstructures (left) and pore microstructures (right).

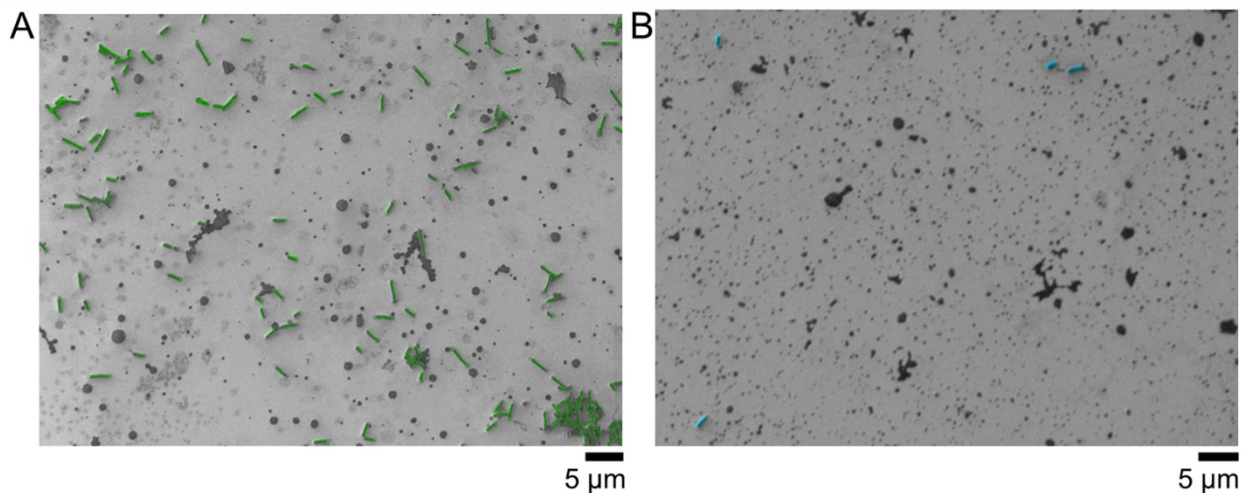

**Figure S2.** False-colored SEM images of (A) *E. coli* WT and (B) *E. coli* K-12 on OX planar Si. Higher degree of attachment of *E. coli* WT to the surface is observed, compared to *E. coli* K-12.

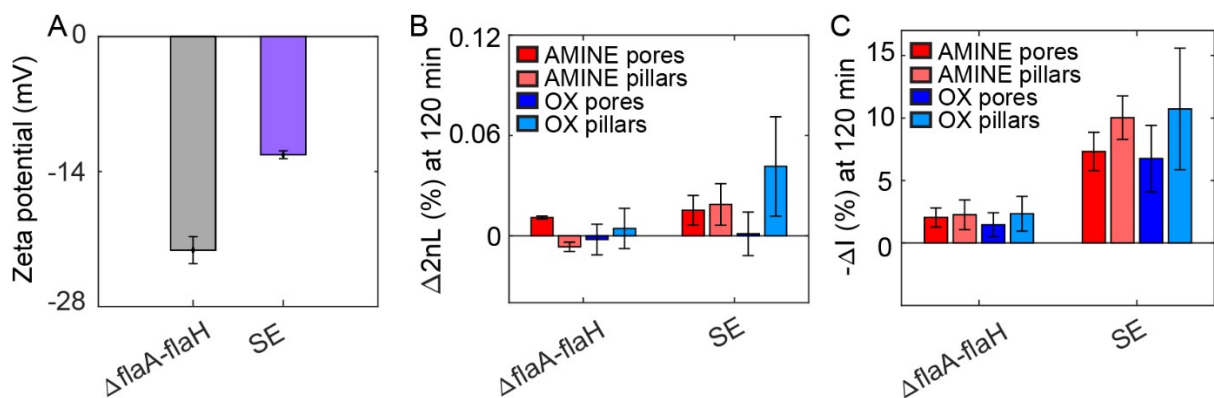

**Figure S3.** Comparison of non-motile strains, *E. coli*  $\Delta flaA-flaH$  and *S. epidermidis*. (A) Zeta potential measurements of bacteria suspended in MB (n = 3). (B) and (C) Comparison bar graph of  $\Delta 2nL$  (%) and  $-\Delta I$  (%) values for OX and AMINE after 120 min of accumulation time.

**Table S1.** ANOVA of the effects of surface chemistry, topology, and bacteria (species or strain) on the mean values of  $\Delta 2nL$  (%) acquired after 120 minutes.

| Source                                       | Sum of Squares | F Value | P Value |
|----------------------------------------------|----------------|---------|---------|
| <b>bacteria<sup>a</sup></b>                  | 5              | 84.0065 | <.0001  |
| <b>topology</b>                              | 1              | 12.3576 | 0.0009  |
| <b>surface chemistry</b>                     | 1              | 9.6059  | 0.003   |
| <b>bacteria*surface chemistry</b>            | 5              | 42.2832 | <.0001  |
| <b>bacteria* topology</b>                    | 5              | 9.5203  | <.0001  |
| <b>topology *surface chemistry</b>           | 1              | 0.9966  | 0.3224  |
| <b>bacteria* topology *surface chemistry</b> | 5              | 2.6488  | 0.032   |

<sup>a</sup>Analysis included *S. epidermidis* and all *E. coli* strains.

**Table S2.** ANOVA of the effects of surface chemistry, topology, and bacteria (species or strain) on the mean values of  $-AI$  (%) acquired after 120 minutes.

| Source                                       | Sum of Squares | F Value | P value |
|----------------------------------------------|----------------|---------|---------|
| <b>bacteria<sup>a</sup></b>                  | 5              | 21.6135 | <.0001  |
| <b>topology</b>                              | 1              | 2.7904  | 0.1003  |
| <b>surface chemistry</b>                     | 1              | 0.2078  | 0.6502  |
| <b>bacteria*surface chemistry</b>            | 5              | 0.3486  | 0.881   |
| <b>bacteria* topology</b>                    | 5              | 1.2323  | 0.3061  |
| <b>topology *surface chemistry</b>           | 1              | 0.9794  | 0.3265  |
| <b>bacteria* topology *surface chemistry</b> | 5              | 0.5181  | 0.7615  |

<sup>a</sup>Analysis included *S. epidermidis* and all *E. coli* strains.
